# Supplementary material for: Facile fabrication of varisized calcium carbonate microspheres as vaccine adjuvants
Source: Royal Society of Chemistry journal article supplement (doi:10.1039/c6tb02845d), 2017-01-01
Supplement: c6tb02845d1.pdf [file c6tb02845d1.pdf]

## Facile Fabrication of Varisized Calcium Carbonate Microspheres as Vaccine Adjuvant

Jilei Jia,<sup>†,‡</sup> Qi Liu,<sup>†,‡</sup> Tingyuan Yang,<sup>†</sup> Lianyan Wang,<sup>\*,†</sup> Guanghui Ma<sup>\*,†,§</sup>

<sup>†</sup> State Key Laboratory of Biochemical Engineering, PLA Key Laboratory of Biopharmaceutical Production & Formulation Engineering, Institute of Process Engineering, Chinese Academy of Sciences, Beijing, 100190, PR China.

<sup>‡</sup> University of Chinese Academy of Sciences, Beijing, 100049, PR China

<sup>§</sup> Jiangsu National Synergetic Innovation Center for Advanced Materials (SICAM), Nanjing, 210023, PR China

<sup>\*</sup> Corresponding authors.

Tel/fax: 8610-82544931, E-mail addresses: wanglianyan@ipe.ac.cn (L.Y. Wang)

Tel/fax: 8610-82627072, E-mail addresses: ghma@ipe.ac.cn (G.H. Ma)

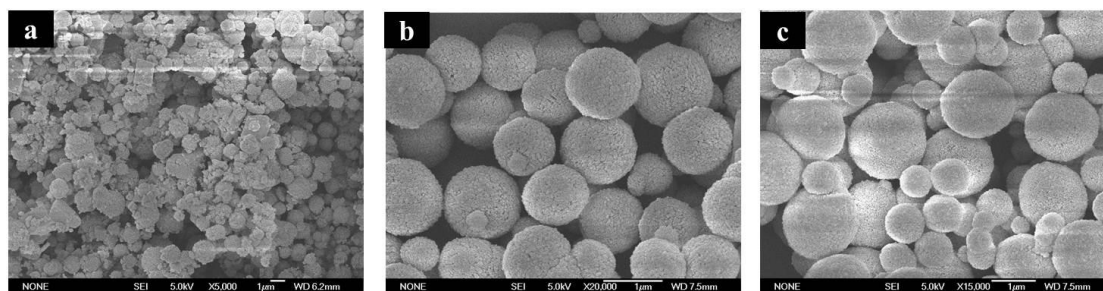

**Figure S1.** SEM images of  $\text{CaCO}_3$  particles synthesized in different ultrasonicating power: (a) 140 W; (b) 200 W; (c) 320 W.

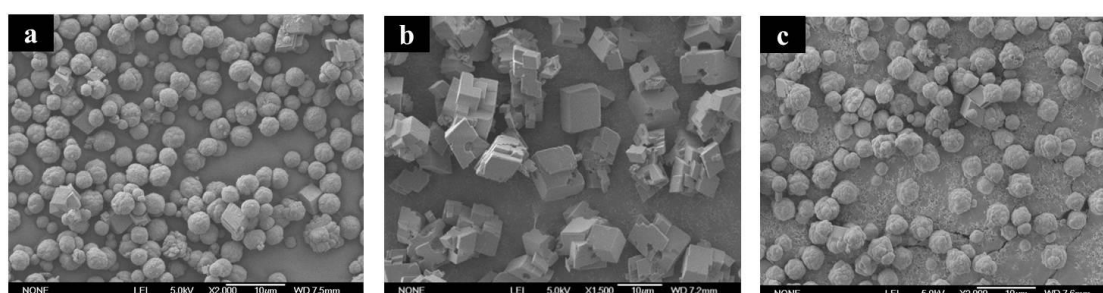

**Figure S2.** The morphology transformation of  $\text{CaCO}_3$  particles. (a) SEM images when the  $\text{CaCO}_3$  MPs were fabricated; (b) the images of  $\text{CaCO}_3$  particles in the water 6 day after fabrication; (c) the photos of  $\text{CaCO}_3$  particles freeze-dried for 6 months.

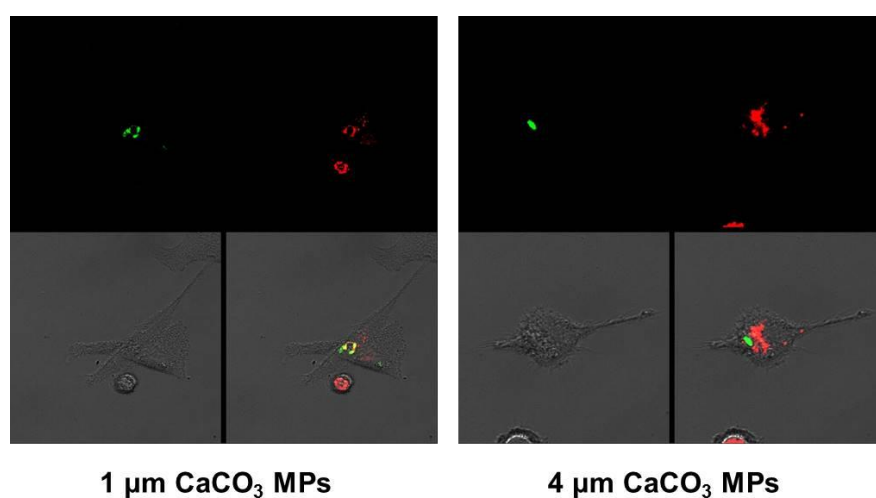

**Figure S3.** Qualitative analyses of MP-mediated antigen internalization into DCs by CLSM. Antigens were labeled by FITC (green points); lysosomes were labeled by Lyso-Tracker Red (red points).

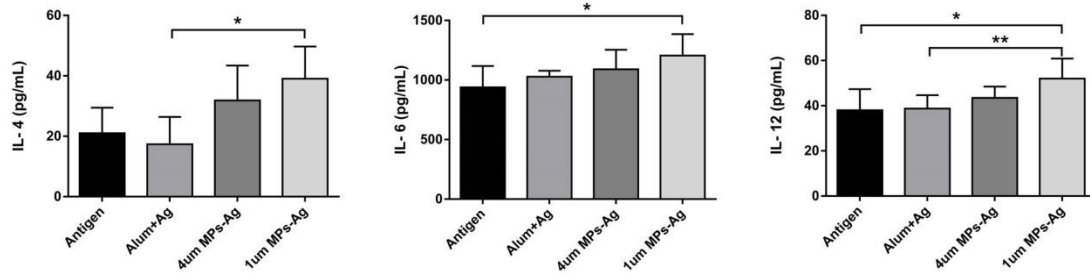

**Figure S4.** Cytokines (IL-4, IL-6 and IL-12) secretion of BMDCs stimulated with different formulations for 24 h.

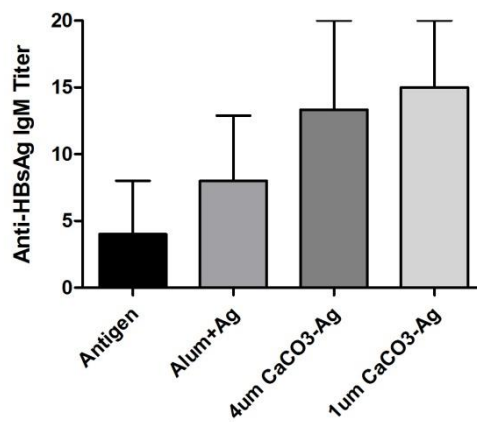

**Figure S5.** Serum anti-HBsAg IgM levels in mice immunized with different formulations on day 7 after primary immunization.
